# Supplementary material for: Arabidopsis thaliana DM2h (R8) within the Landsberg RPP1-like Resistance Locus Underlies Three Different Cases of EDS1-Conditioned Autoimmunity
Source: PubMed Central journal article supplement (PMC4833295; doi:10.1371/journal.pgen.1005990), 2016-04-15

Supplemental Figure S6

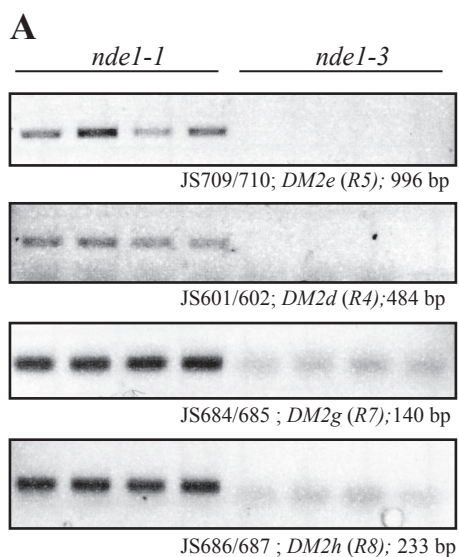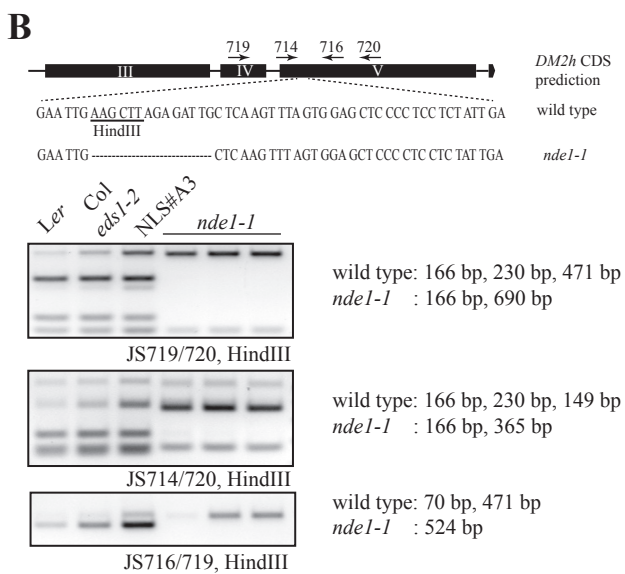

Supplement: pgen.1005990.s010.pdf [file pgen.1005990.s010.pdf]
