# Supplementary material for: Arabidopsis thaliana DM2h (R8) within the Landsberg RPP1-like Resistance Locus Underlies Three Different Cases of EDS1-Conditioned Autoimmunity
Source: PubMed Central journal article supplement (PMC4833295; doi:10.1371/journal.pgen.1005990), 2016-04-15
Supplement: pgen.1005990.s015.pdf [file pgen.1005990.s015.pdf]

Supplemental Figure S11

predicted N-myristoylation motif                      predicted bipartite NLS

001 **M**GSAMSLSCS **KRK**TTSQD **V**DSESR**KRRK**LCSTNDAENCRFIQDESSWKHP 50  
 051 WSLCVNVA~~AAAF~~TKFRFQODNKYTKSSALSLSPPPTSVSRIWKHHVFPSE 100  
 101 HGADVRKTILSHILESFRKGDIDPFIDNNIERSKSIGHELKEAIKGSKIA 150  
 151 IVLLSKNYASSWCLDELAEIMKCRELLGQIVMTIFYEVDPTDIKKQTGE 200  
 201 FGKAFTKTCKGKTKEYVERWRKALEDVATIAGEHSRNWRNEADMIEKIAT 250  
 251 DVSNMLNSFTPSRDFDGLVGMRAHMDMLEQLLRDLDEVRMIGIWGPPGI 300  
 301 GKTTIARFLFNQVSDRFQLSAIIVNIRGIYPRPCFDEYSAQLQLQNQMLS 350  
 351 QMINHKDIMISHLGVAQERLRDKKVFLVLDEVDQLGQLDALAKETRWFPG 400  
 401 GSRIITTTEDLGVLKAHGINHVYKVKYPSNDEAFQIFCMNAFGQKQPHEG 450  
 451 FDEIAREVMALAGELPLGLKVLGSALRGKSKPEWERTLPRLKTSLDGNIG 500  
 501 SIIQFSYDGLCDEDKYLFLYIACLFKDELSTKVEEVLANKFLDVKQGLHV 550  
 551 LAQKSLISIDENSFYGDTINMHTLLRQFGRETSRKQFVYHGFTKRQLLVG 600  
 601 ERDICEVLSDDTIDSRRFIGIHLDLKSEEELNISEKVLERVHDFHFVRI 650  
 651 DASFQPERLQALQDLICHSPKIRSLKWYSYQNICLPSTFNPEFLVELHM 700  
 701 SFSKLRKLWEGTKQLRNLKWMDLNSSEDLKELPNLSTATN 740

LRR1 741 **LEELKLRDCSSLVELPSSIEKLTS** 764  
 LRR2 765 **LQRLYLQRCSSLVELPSFGNATK** 787  
 LRR3 788 **LEELYLENCSSLEKLPPSINANN** 810  
 LRR4 811 **LQQLSLINCSRVELPAIENATN** 833  
 LRR5 834 **LQVLDLHNCSSLLELPPSIASATN** 857  
 LRR6 858 **LKKLDISGCSSLVKLPSSIGDMTN** 881  
 LRR7 882 **LDVLDLSNCSSLVELPININLKS** 904  
 LRR8 905 **FLAVNLAGCSQLKSFPEISTKIIFTDCYQRMSR** 936

C -> Y in *nde1-175*

LRR9 937 **LRDLRINN****C**NNLVSLPQLPDS 957  
 LRR10 958 **LAYLYADNCKSLERL**DCCFNPEIS 982

983 LNFPKCFKLNQEARDLIMHTTCINATLPGTQVPACFNHRATSGDSLKIKL 1032

R -> C in *nde1-150*

1033 KESSLPTTLRFKACIMLVKVNEEMSSDLKSMSFDP**R**VDIVIRDEQNDLK 1082

W -> STOP in *nde1-13*

1083 VQCTPSYHFINHFIISTEHIYTFELEVVEEVTSTELVFEFTLDKES**W**KRN 1132  
 1133 WKIGECGILQRETRSLRRSSSPDLSPESSRVSSCDHC 1169
