# Supplementary material for: Arabidopsis thaliana DM2h (R8) within the Landsberg RPP1-like Resistance Locus Underlies Three Different Cases of EDS1-Conditioned Autoimmunity
Source: PLoS Genet. 2016 Apr 15;12(4):e1005990. doi: 10.1371/journal.pgen.1005990 (PMC4833295; doi:10.1371/journal.pgen.1005990)
Supplement: S2 Table — (XLSX) [file pgen.1005990.s002.xlsx]

## Sheet: Sheet1
UP in EDS1-YFP-NLS#A5 but not in others			DOWN in EDS1-YFP-NLS #A5 but not in others
247791_at	AT5G58710		245928_s_at	AT5G24770;AT5G24780
255587_at	AT4G01480		254150_at	AT4G24350
249309_at	AT5G41410		254163_s_at	AT4G24340;AT4G24350
251320_at	AT3G61530		263150_at	AT1G54050
266778_at	AT2G29090		245501_at	AT4G15620
248908_at	AT5G45800		267344_at	AT2G44230
261866_at	AT1G50420		257288_at	AT3G29670
254834_at	AT4G12300		252377_at	AT3G47960
262667_at	AT1G62810		260367_at	AT1G69760
249427_at	AT5G39850		258901_at	AT3G05640
250729_at	AT5G06460		255926_at	AT1G22190
254080_at	AT4G25630		265547_at	AT2G28305
264118_at	AT1G79150		252679_at	AT3G44260
262094_at	AT1G56110		255568_at	AT4G01250
260955_at	AT1G06000		246385_at	AT1G77390
253423_at	AT4G32280		255536_at	AT4G01575
252663_at	AT3G44070		261482_at	AT1G14530
256062_at	AT1G07090		245250_at	AT4G17490
250344_at	AT5G11930		251774_at	AT3G55840
266820_at	AT2G44940		265732_at	AT2G01300
251017_at	AT5G02760		261428_at	AT1G18870
256874_at	AT3G26320		267411_at	AT2G34930
265464_at	AT2G37080		247524_at	AT5G61440
247717_at	AT5G59320		251105_at	AT5G01730
245228_at	AT3G29810		263876_at	AT2G21880
251109_at	AT5G01600		264153_at	AT1G65390
262590_at	AT1G15100		264213_at	AT1G65390
253052_at	AT4G37310		245777_at	AT1G73540
250937_at	AT5G03230		255549_at	AT4G01950
246524_at	AT5G15860		260248_at	AT1G74310
266363_at	AT2G41250		245866_s_at	AT1G57990;AT1G57980
259169_at	AT3G03520		259979_at	AT1G76600
246566_at	AT5G14940		253628_at	AT4G30280
247696_at	AT5G59780		246340_s_at	AT3G44860;AT3G44870
260774_at	AT1G78290		260206_at	AT1G70740
256266_at	AT3G12320		265737_at	AT2G01180
261191_at	AT1G32900		252265_at	AT3G49620
246125_at	AT5G19875		262360_at	AT1G73080
257625_at	AT3G26230		260411_at	AT1G69890
254251_at	AT4G23300		259076_at	AT3G02140
256529_at	AT1G33260		260915_at	AT1G02660
254390_at	AT4G21940		266316_at	AT2G27080
264022_at	AT2G21185
249306_at	AT5G41400
261195_at	AT1G12820
262281_at	AT1G68570
257129_at	AT3G20100
252619_at	AT3G45210
267432_at	AT2G35020
256427_at	AT3G11090
262050_at	AT1G80130
257973_at	AT3G20720
257628_at	AT3G26290
257314_at	AT3G26590
263787_at	AT2G46420
267423_at	AT2G35060
